# Supplementary material for: Metabolome disruption of pregnant rats and their offspring resulting from repeated exposure to a pesticide mixture representative of environmental contamination in Brittany
Source: PLoS One. 2018 Jun 20;13(6):e0198448. doi: 10.1371/journal.pone.0198448 (PMC6010212; doi:10.1371/journal.pone.0198448)
Supplement: S5 Table — (XLSX) [file pone.0198448.s005.xlsx]

## Sheet: Plasma F1_males
Name	Group	8.495	8.485	8.475	8.465	8.455	8.445	8.435	8.425	8.415	8.405	8.395	8.385	8.375	8.365	8.355	8.345	8.335	8.325	8.315	8.305	8.295	8.285	8.275	8.265	8.255	8.245	8.235	8.225	8.215	8.205	8.195	8.185	8.175	8.165	8.155	8.145	8.135	8.125	8.115	8.105	8.095	8.085	8.075	8.065	8.055	8.045	8.035	8.025
"Met_pl_G0-37_30_1 "		2.177e-05	2.854e-05	2.23e-05	1.781e-05	0.0002562	1.07e-05	1.831e-05	1.338e-05	2.053e-05	2.523e-05	1.306e-05	2.285e-05	2.045e-05	1.239e-05	1.837e-05	1.413e-05	1.706e-05	2.297e-05	1.925e-05	3.56e-05	1.483e-05	1.939e-05	1.644e-05	2.203e-05	2.49e-05	2.611e-05	1.044e-05	2.213e-05	3.368e-05	1.577e-05	2.619e-05	6.689e-05	0.0004181	7.303e-05	2.429e-05	1.525e-05	1.881e-05	1.482e-05	2.298e-05	1.682e-05	1.688e-05	1.563e-05	1.758e-05	2.544e-05	2.152e-05	1.681e-05	2.382e-05	1.808e-05
"Met_pl_G0-39_30_1 "	0	1.686e-05	2.588e-05	2.546e-05	2.473e-05	0.00019939	1.026e-05	1.457e-05	1.704e-05	1.772e-05	1.583e-05	1.414e-05	1.409e-05	1.886e-05	1.744e-05	1.316e-05	1.741e-05	1.201e-05	1.933e-05	2.355e-05	1.824e-05	1.359e-05	1.451e-05	2.566e-05	2.397e-05	2.509e-05	3.095e-05	1.739e-05	1.582e-05	3.05e-05	2.168e-05	1.803e-05	5.504e-05	0.00042309	0.00010268	1.865e-05	1.607e-05	1.252e-05	1.646e-05	1.636e-05	1.11e-05	1.709e-05	1.324e-05	1.914e-05	2.095e-05	2e-05	1.367e-05	1.238e-05	1.45e-05
"Met_pl_G0-41_20_1 "	0	3.316e-05	2.315e-05	3.203e-05	3.051e-05	0.00027924	2.48e-05	1.795e-05	1.923e-05	2.401e-05	1.714e-05	1.59e-05	1.783e-05	2.112e-05	1.362e-05	2.236e-05	1.535e-05	1.997e-05	2.407e-05	1.843e-05	2.748e-05	3.017e-05	2.259e-05	2.409e-05	2.587e-05	3.404e-05	1.942e-05	1.841e-05	1.287e-05	4.511e-05	1.645e-05	2.502e-05	1.939e-05	0.00034441	0.00020435	1.846e-05	1.389e-05	3.056e-05	1.979e-05	1.958e-05	1.458e-05	3.251e-05	2.806e-05	2.066e-05	1.772e-05	2.714e-05	2.039e-05	2.274e-05	2.683e-05
"Met_pl_G0-43_20_1 "	0	1.971e-05	2.396e-05	2.789e-05	1.927e-05	0.00023295	1.558e-05	1.949e-05	1.727e-05	2.104e-05	2.019e-05	2.382e-05	2.363e-05	1.772e-05	2.045e-05	1.966e-05	1.888e-05	1.956e-05	2.611e-05	2.719e-05	2.77e-05	1.784e-05	3.707e-05	1.773e-05	2.291e-05	3.374e-05	2.859e-05	1.822e-05	1.318e-05	2.418e-05	2.164e-05	2.299e-05	4.558e-05	0.00042765	0.00010425	2.151e-05	2.052e-05	2.11e-05	1.232e-05	1.725e-05	2.45e-05	2.085e-05	1.716e-05	2.365e-05	2.112e-05	2.163e-05	2.231e-05	1.968e-05	1.505e-05
"Met_pl_G0-45_20_1 "	0	2.725e-05	1.686e-05	2.494e-05	3.549e-05	0.00030309	2.439e-05	1.722e-05	1.928e-05	1.835e-05	2.417e-05	2.218e-05	1.985e-05	1.823e-05	1.604e-05	1.525e-05	1.816e-05	2.148e-05	2.469e-05	2.167e-05	2.718e-05	3.211e-05	2.254e-05	1.332e-05	1.425e-05	2.943e-05	3.002e-05	1.912e-05	2.557e-05	2.75e-05	2.601e-05	2.592e-05	2.26e-05	0.00016274	0.0003886	3.098e-05	1.947e-05	1.483e-05	2.032e-05	3.138e-05	1.466e-05	1.848e-05	2.23e-05	1.843e-05	1.363e-05	1.472e-05	2.218e-05	2.425e-05	2.367e-05
"Met_pl_G0-49_20_1 "	0	2.17e-05	2.618e-05	1.557e-05	2.456e-05	0.00031083	2.054e-05	1.969e-05	1.229e-05	1.673e-05	1.437e-05	2.144e-05	1.864e-05	1.582e-05	1.475e-05	1.718e-05	1.504e-05	1.303e-05	2.109e-05	2.772e-05	1.394e-05	1.209e-05	1.572e-05	1.487e-05	1.973e-05	2.247e-05	2.171e-05	2.101e-05	1.487e-05	3.331e-05	2.091e-05	2.23e-05	0.00013899	0.00034018	2.396e-05	3.052e-05	1.291e-05	2.037e-05	1.782e-05	1.905e-05	2.341e-05	1.17e-05	1.627e-05	1.543e-05	1.805e-05	2.692e-05	1.862e-05	1.743e-05	1.86e-05
"Met_pl_G0-F1term_2 "	0	3.965e-05	2.632e-05	3.136e-05	4.941e-05	0.00025608	1.928e-05	1.958e-05	2.329e-05	3.782e-05	2.722e-05	2.374e-05	2.587e-05	2.751e-05	1.957e-05	2.58e-05	1.979e-05	2.602e-05	2.336e-05	2.537e-05	3.23e-05	4.502e-05	2.787e-05	2.219e-05	2.159e-05	3.227e-05	2.606e-05	2.961e-05	4.242e-05	2.907e-05	3.27e-05	2.537e-05	2.649e-05	3.594e-05	0.00037748	2.62e-05	2.71e-05	2.183e-05	1.9e-05	2.805e-05	3.152e-05	2.393e-05	2.563e-05	1.783e-05	2.324e-05	2.632e-05	3.298e-05	3.027e-05	2.238e-05
"Met_pl_G2-64_1_1 "	1	2.398e-05	1.876e-05	3.181e-05	4.722e-05	0.00025974	2.1e-05	2.693e-05	2.449e-05	1.767e-05	2.34e-05	3.621e-05	2.576e-05	2.604e-05	2.479e-05	2.727e-05	2.161e-05	1.655e-05	1.827e-05	2.588e-05	2.37e-05	2.472e-05	2.861e-05	2.531e-05	1.456e-05	2.464e-05	2.323e-05	2.329e-05	1.528e-05	3.239e-05	1.876e-05	2.578e-05	2.976e-05	0.00024906	4.469e-05	1.403e-05	1.535e-05	2.232e-05	2.473e-05	1.616e-05	2.617e-05	2.21e-05	1.545e-05	1.738e-05	2.359e-05	2.054e-05	3.004e-05	2.199e-05	1.89e-05
"Met_pl_G2-65_1_1 "	1	1.804e-05	2.638e-05	2.028e-05	2.837e-05	0.00026023	2.226e-05	1.711e-05	2.086e-05	1.786e-05	2.437e-05	2.1e-05	3.728e-05	1.879e-05	3.176e-05	2.086e-05	2.556e-05	3.126e-05	2.175e-05	2.505e-05	2.576e-05	2.181e-05	2.871e-05	2.459e-05	2.198e-05	2.037e-05	2.582e-05	2.832e-05	1.932e-05	2.497e-05	1.735e-05	1.774e-05	2.703e-05	0.00021637	0.00010858	2.421e-05	2.189e-05	2.179e-05	2.743e-05	2.406e-05	2.676e-05	2.474e-05	2.031e-05	1.989e-05	2.313e-05	2.459e-05	2.053e-05	1.954e-05	3.108e-05
"Met_pl_G2-67_1_1 "	1	2.451e-05	3.564e-05	1.797e-05	3.867e-05	0.00024313	3.11e-05	3.232e-05	2.445e-05	3.001e-05	3.002e-05	2.686e-05	2.345e-05	1.9e-05	2.473e-05	3.179e-05	2.148e-05	2.488e-05	2.207e-05	2.643e-05	5.751e-05	2.197e-05	2.112e-05	2.377e-05	3.378e-05	3.061e-05	2.223e-05	3.47e-05	3.013e-05	3.081e-05	2.189e-05	2.585e-05	2.308e-05	0.0001877	0.00014659	2.164e-05	2.113e-05	2.599e-05	2.874e-05	2.207e-05	1.85e-05	2.191e-05	2.632e-05	2.684e-05	3.124e-05	3.033e-05	1.777e-05	2.543e-05	2.494e-05
"Met_pl_G2-69_1_1 "	1	2.467e-05	2.104e-05	1.456e-05	3.027e-05	0.00021238	1.913e-05	2.3e-05	2.931e-05	2.634e-05	1.337e-05	1.697e-05	2.094e-05	1.386e-05	2.212e-05	2.903e-05	1.691e-05	2.89e-05	2.539e-05	1.813e-05	1.922e-05	2.967e-05	1.601e-05	1.857e-05	2.294e-05	2.295e-05	2.527e-05	1.509e-05	2.961e-05	2.46e-05	1.656e-05	1.703e-05	0.00012999	0.00027223	2.773e-05	1.808e-05	2.089e-05	1.999e-05	1.494e-05	1.566e-05	1.981e-05	1.882e-05	1.912e-05	1.952e-05	1.706e-05	2.188e-05	2.082e-05	1.974e-05	1.519e-05
"Met_pl_G2-F1bism_1 "	1	2.817e-05	2.704e-05	2.872e-05	4.285e-05	0.00024582	2.438e-05	3.102e-05	3.031e-05	2.312e-05	3.198e-05	3.075e-05	3.612e-05	3.81e-05	2.41e-05	2.832e-05	1.796e-05	3.111e-05	3.996e-05	2.639e-05	3.183e-05	4.774e-05	2.338e-05	3.283e-05	2.853e-05	2.698e-05	3.141e-05	2.492e-05	2.676e-05	3.669e-05	2.253e-05	2.302e-05	1.971e-05	5.389e-05	0.00037792	4.024e-05	3.189e-05	2.219e-05	2.329e-05	1.876e-05	2.569e-05	2.015e-05	2.593e-05	2.706e-05	3.471e-05	3.495e-05	2.685e-05	4.449e-05	2.536e-05
"Met_pl_G2-F1term_1 "	1	2.199e-05	2.674e-05	2.895e-05	3.971e-05	0.0002402	1.837e-05	2.598e-05	2.526e-05	1.993e-05	2.579e-05	2.082e-05	2.59e-05	2.104e-05	3.188e-05	2.87e-05	2.666e-05	3.377e-05	3.336e-05	1.951e-05	2.817e-05	2.441e-05	3.046e-05	1.93e-05	2.436e-05	2.509e-05	3.18e-05	2.467e-05	2.44e-05	4.23e-05	2.028e-05	1.888e-05	1.596e-05	0.00025913	0.00011296	1.977e-05	1.81e-05	2.352e-05	2.461e-05	2.221e-05	1.983e-05	2.295e-05	3.228e-05	1.687e-05	2.416e-05	2.44e-05	1.955e-05	2.534e-05	1.946e-05
[truncated: 649 more columns]
